# Supplementary material for: Traits and the City: functional trait space in urban bird and bat assemblages
Source: Research Square preprint supplement (doi:10.21203/rs.3.rs-8172612/v1), 2025-12-04
Supplement: Supplementary file 2 [file 3972bcc8c72ecef332f85fef.docx]

**Traits and the City: functional trait space in urban bird and bat assemblages**

Marina Querejeta1, Élie Morin2, Axel Jame1, Simon Chapenoire3, Alice Chéron4, Hélène Paulhac1, Mohamed Said Ramdani1,Yvonnick Guinard5, Thibaut Preux6, Romain Michenaud7, Jean-Louis Yengue6, Dominique Royoux6, Thomas Rodier7, Nicolas Bech1*, Sophie Beltran-Bech1*

1 Laboratory of Ecologie et Biologie des Interactions (EBI), UMR CNRS 7267, University of Poitiers, Bâtiment B31, 3 Rue Jacques Fort, TSA 51106, 86073 Poitiers Cedex 9, France

2 PICTAMAP, 4 B rue du moulin 86130, Jaunay-Marigny, France

3 LPO, DT Poitou-Charentes, 25 rue Victor Grignard, Poitiers

4Vienne Nature, 14 rue Jean Moulin, 86240, Fontaine-le-Comte, France

5Agence Régionale de la Biodiversité Nouvelle Aquitaine, 86962, Futuroscope Chasseneuil Cedex, France

6Laboratory of RURALITES, UR13823, University of Poitiers, MSHS, Bâtiment A5, 5, rue Théodore-Lefèbvre, TSA 21103, 86073 Poitiers Cedex 9, France

7Grand Poitiers Communauté Urbaine, 86000 Poitiers, France

*Co-last authors contributed equally to this study

**Corresponding author:** Marina Querejeta. ORCID : 0000-0003-1803-5239. E-mail: [marina.querejeta@univ-poitiers.fr](mailto:marina.querejeta@univ-poitiers.fr)

**Supporting Information B**

**Table S1.** Pearson correlations and p-values between landscape urban variables and Mean Functional Distance (MFD).

|  | R | p-value |
| --- | --- | --- |
| Density of overall vegetation | -0.32 | 0.023 |
|  |
|  |
| Density of tree vegetation | -0.37 | 0.0074 |  |
|  |
|  |
| Density of impervious surfaces | 0.27 | 0.04 |  |
|  |
|  |
| Density of buildings | 0.34 | 0.0016 |  |
|  |
|  |
| Distance to agricultural and semi-natural elements | 0.32 | 0.022 |  |
|  |
|  |
| Diversity of vegetation strata | 0.24 | 0.098 |  |
|  |
|  |
| Distance to permanent water and wetland bodies | 0.32 | 0.024 |  |
|  |
|  |
| Distance to permanent water and wetlands. | 0.11 | 0.44 |  |
|  |
|  |

**Table S2.** Functional traits compiled for A) bird and (B) bat species included in the study.

A)

|  |  | **Morphological traits** | | | | **Life-history traits** | | **Habitat-related traits** | | **Distribution trait** | **Nominal traits** | | | | |
| --- | --- | --- | --- | --- | --- | --- | --- | --- | --- | --- | --- | --- | --- | --- | --- |
| **SpID** | **Species** | **Beak length (mm)** | **Tarsus Length (mm)** | **Hand Wing Index (HWI)** | **Body Mass (g)** | **Clutch size** | **Lifespan (ys)** | **Species Specialization Index (SSI)** | **Species Temperature Index (STI)** | **Geographical distribution range size (km2)** | **Habitat** | **Migratory status** | **Primary Lifestyle** | **Trophic Level** | **Trophic Niche** |
| Sp1 | *Accipiter nisus* | 19.6 | 53.6 | 35.5 | 220.8 | 5 | 4 | 0.415 | 9.502 | 23601609.31 | Forest | sedentary | Insessorial | Carnivore | Vertivore |
| Sp2 | *Aegithalos caudatus* | 7.6 | 15.9 | 22 | 8.6 | 10 | 8 | 0.251 | 11.228 | 18247301.19 | Forest | sedentary | Insessorial | Carnivore | Invertivore |
| Sp3 | *Alauda arvensis* | 14.6 | 23.6 | 33.6 | 37.3 | 16.2 | 12 | 0.339 | 10.798 | 26018285.25 | Grassland | migratory | Terrestrial | Omnivore | Omnivore |
| Sp4 | *Alcedo atthis* | 42.2 | 9.9 | 26.9 | 31.1 | 6.5 | 7 | 0.651 | 17.41 | 24992154.31 | Riverine | sedentary | Insessorial | Carnivore | Aquatic predator |
| Sp5 | *Alectoris rufa* | 23.4 | 41.3 | 25.8 | 527.9 | 26 | 6 | 0.238 | 15.934 | 953692.19 | Grassland | sedentary | Terrestrial | Herbivore | Herbivore terrestrial |
| Sp6 | *Anas platyrhynchos* | 58.5 | 40.6 | 50.7 | 843.4 | 11 | 29 | 0.315 | 10.5 | 39707247.47 | Wetland | migratory | Aquatic | Herbivore | Herbivore aquatic |
| Sp7 | *Anthus pratensis* | 14.2 | 21.5 | 24.3 | 18.4 | 8 | 8 | 0.585 | NA | 6733599.47 | Grassland | migratory | Terrestrial | Carnivore | Invertivore |
| Sp8 | *Anthus trivialis* | 15.7 | 20.6 | 29.3 | 23.3 | 10 | 8 | 0.337 | 10.322 | 15353264.33 | Woodland | migratory | Terrestrial | Omnivore | Invertivore |
| Sp9 | *Apus apus* | 10.2 | 8.8 | 71.6 | 37.6 | 3 | 21 | 0.737 | 13.837 | 24779919.71 | Human Modified | migratory | Aerial | Carnivore | Invertivore |
| Sp10 | *Ardea cinerea* | 138.9 | 137.9 | 34.6 | 1443 | 4 | 25 | 0.503 | 18.081 | 46421646.29 | Wetland | sedentary | Terrestrial | Carnivore | Aquatic predator |
| Sp11 | *Burhinus oedicnemus* | 43.1 | 75.1 | 47.7 | 459 | 2 | 16 | 0.524 | 19.654 | 9168330.74 | Grassland | migratory | Terrestrial | Carnivore | Invertivore |
| Sp12 | *Buteo buteo* | 35.9 | 75.8 | 38.3 | 759.1 | 3 | 25 | 0.506 | 12.475 | 11719424.27 | Woodland | migratory | Insessorial | Carnivore | Vertivore |
| Sp13 | *Linaria cannabina* | 12.4 | 15.7 | 34.4 | 19.5 | 10 | 9 | NA | 13.802 | 10715477.38 | Shrubland | migratory | Terrestrial | Herbivore | Granivore |
| Sp14 | *Carduelis carduelis* | 15.4 | 14.7 | 33.4 | 16 | 16 | 8 | 0.37 | 13.986 | 11860717.87 | Woodland | migratory | Insessorial | Herbivore | Granivore |
| Sp15 | *Chloris chloris* | 14.4 | 17.3 | 32.5 | 26 | 10 | 13 | 0.477 | 13.587 | 10220595.83 | Woodland | migratory | Generalist | Herbivore | Granivore |
| Sp16 | *Spinus spinus* | 12.8 | 12.7 | 36.5 | 13.2 | 4.5 | 9 | NA | 10.25 | 8968022.11 | Forest | migratory | Insessorial | Herbivore | Granivore |
| Sp17 | *Certhia brachydactyla* | 18.7 | 14.9 | 17.7 | 8.2 | 13 | 9 | 0.291 | 15.184 | 3199552.33 | Forest | sedentary | Insessorial | Carnivore | Invertivore |
| Sp18 | *Cettia cetti* | 14.3 | 20.3 | 14.3 | 13.2 | 9 | 5 | 0.284 | 17.269 | 5290133.33 | Shrubland | sedentary | Generalist | Carnivore | Invertivore |
| Sp19 | *Columba livia f. domestica* | 23.2 | 26.5 | 45.1 | 354.2 | 10 | 6 | 0.63 | 22.352 | 17464191.46 | Human Modified | sedentary | Terrestrial | Herbivore | Granivore |
| Sp20 | *Columba palumbus* | 27.8 | 31.5 | 41.2 | 490 | 2.25 | 16 | 0.339 | 13.717 | 11947217.36 | Woodland | migratory | Terrestrial | Herbivore | Omnivore |
| Sp21 | *Corvus corone* | 55 | 59.4 | 36.9 | 570 | 4.5 | 16 | 0.164 | 10.903 | 33343165.09 | Woodland | sedentary | Terrestrial | Carnivore | Omnivore |
| Sp22 | *Coloeus monedula* | 35.2 | 43.3 | 39.1 | 246 | 5 | 14 | 0.009 | NA | 13975046.48 | Human Modified | sedentary | Terrestrial | Omnivore | Omnivore |
| Sp23 | *Cuculus canorus* | 26 | 21.4 | 43.9 | 111.4 | 13 | 13 | 0.228 | 11.641 | 37338142.79 | Forest | migratory | Insessorial | Carnivore | Invertivore |
| Sp24 | *Cyanistes caeruleus* | 9.7 | 15.2 | 21 | 11.1 | 9 | 2.5 | 0.22 | 13.689 | 8753389.8 | Forest | sedentary | Insessorial | Omnivore | Invertivore |
| Sp25 | *Delichon urbicum* | 10.7 | 11.3 | 54.3 | 14.5 | 8 | 15 | 0.622 | 12.512 | 16377219.72 | Human Modified | migratory | Aerial | Carnivore | Invertivore |
| Sp26 | *Dendrocopos major* | 27.9 | 23.9 | 29.3 | 74.9 | 5.5 | 11 | 0.292 | 11.091 | 24413724.29 | Woodland | sedentary | Insessorial | Omnivore | Omnivore |
| Sp27 | *Dendrocoptes medius* | 16.4 | 19.5 | 28.1 | 59 | 5.5 | 8 | NA | NA | 3966649.98 | Forest | sedentary | Insessorial | Carnivore | Invertivore |
| Sp28 | *Dryobates minor* | 12.6 | 14.3 | 27.4 | 19.8 | 5 | 7 | 0.398 | 10.426 | 18548908.46 | Woodland | sedentary | Insessorial | Carnivore | Invertivore |
| Sp29 | *Emberiza calandra* | 16.2 | 24.4 | 26.5 | 48.5 | 7.5 | 10 | 0.695 | 16.041 | 7483952.2 | Grassland | migratory | Terrestrial | Herbivore | Omnivore |
| Sp30 | *Emberiza cirlus* | 13.4 | 18.2 | 20.2 | 25.6 | 10.5 | 10 | 0.623 | 16.141 | 2173407.94 | Shrubland | migratory | Terrestrial | Omnivore | Granivore |
| Sp31 | *Erithacus rubecula* | 14 | 24.5 | 19.9 | 17.7 | 10 | 15 | 0.151 | 12.317 | 10001378.73 | Forest | migratory | Generalist | Carnivore | Omnivore |
| Sp32 | *Fringilla coelebs* | 14.7 | 17.8 | 27.6 | 23.8 | 4.5 | 14 | 0.194 | 12.546 | 13931193.45 | Forest | migratory | Generalist | Omnivore | Invertivore |
| Sp33 | *Gallinula chloropus* | 33.9 | 45.9 | 32.2 | 339.6 | 14 | 15 | 0.278 | 19.195 | 38515141.7 | Wetland | sedentary | Terrestrial | Omnivore | Omnivore |
| Sp34 | *Garrulus glandarius* | 33 | 39.1 | 19.4 | 159.5 | 6 | 18 | 0.205 | 12.303 | 19458203.9 | Forest | sedentary | Insessorial | Omnivore | Omnivore |
| Sp35 | *Hippolais polyglotta* | 14.5 | 20.4 | 21.2 | 11 | 4 | 6 | 0.347 | 16.239 | 1710837.05 | Shrubland | migratory | Insessorial | Carnivore | Invertivore |
| Sp36 | *Hirundo rustica* | 12.4 | 11.7 | 52.6 | 17.9 | 9 | 16 | 0.773 | 12.867 | 51701054.06 | Human Modified | migratory | Aerial | Carnivore | Invertivore |
| Sp37 | *Luscinia megarhynchos* | 16 | 26.4 | 27.6 | 19.6 | 9 | 5 | 0.298 | 16.392 | 6778462.19 | Shrubland | migratory | Generalist | Carnivore | Invertivore |
| Sp38 | *Motacilla alba* | 16.1 | 23.4 | 31.4 | 23.9 | 11 | 10 | 0.268 | 9.816 | 39488711.64 | Human Modified | migratory | Terrestrial | Carnivore | Invertivore |
| Sp39 | *Motacilla cinerea* | 17.4 | 18.2 | 34.6 | 17.2 | 10 | 3 | 0.397 | 9.879 | 19613139.17 | Riverine | sedentary | Terrestrial | Carnivore | Invertivore |
| Sp40 | *Parus major* | 11.3 | 17.4 | 18.7 | 16.3 | 15.75 | 15 | 0.234 | 14.937 | 32577984.28 | Woodland | sedentary | Insessorial | Omnivore | Invertivore |
| Sp41 | *Passer domesticus* | 13.5 | 17.9 | 27.3 | 26.5 | 10 | 13 | 0.285 | 15.229 | 34407867.59 | Human Modified | sedentary | Terrestrial | Herbivore | Granivore |
| Sp42 | *Phalacrocorax carbo* | 82.7 | 64.2 | 37.1 | 2529 | 5 | 20 | 0.529 | 17.537 | 24540701.98 | Wetland | migratory | Aquatic | Carnivore | Aquatic predator |
| Sp43 | *Phoenicurus ochruros* | 15.4 | 22.4 | 23.1 | 16.5 | 10 | 8 | 0.315 | 12.582 | 13764225.49 | Human Modified | migratory | Insessorial | Omnivore | Invertivore |
| Sp44 | *Phoenicurus phoenicurus* | 13.9 | 21.6 | 25.8 | 14.6 | 12 | 9 | 0.274 | 11.676 | 14485113.51 | Woodland | migratory | Insessorial | Carnivore | Invertivore |
| Sp45 | *Phylloscopus collybita* | 11.6 | 19.7 | 18.4 | 8.3 | 11 | 7 | 0.48 | 12.488 | 7564956.38 | Forest | migratory | Insessorial | Carnivore | Invertivore |
| Sp46 | *Phylloscopus trochilus* | 12.8 | 19.3 | 25.9 | 8.7 | 6 | 7 | 0.209 | NA | 15839222.41 | Forest | migratory | Insessorial | Carnivore | Invertivore |
| Sp47 | *Pica pica* | 40.8 | 49.1 | 22.9 | 217.5 | 6 | 15 | 0.201 | 13.122 | 31831405.08 | Woodland | sedentary | Terrestrial | Omnivore | Omnivore |
| Sp48 | *Picus viridis* | 45 | 29 | 24.7 | 176 | 6 | 7 | 0.448 | NA | 5981746.04 | Woodland | sedentary | Terrestrial | Carnivore | Invertivore |
| Sp49 | *Poecile palustris* | 9.4 | 15.9 | 17.9 | 11.1 | 8 | 10 | 0.39 | 12.602 | 9072135.09 | Forest | sedentary | Insessorial | Omnivore | Invertivore |
| Sp50 | *Prunella modularis* | 14 | 20.4 | 21.2 | 20.2 | 10 | 9 | 0.368 | 11.022 | 6779516.3 | Shrubland | migratory | Terrestrial | Omnivore | Invertivore |
| Sp51 | *Regulus ignicapilla* | 10.9 | 16.5 | 22 | 5.6 | 18 | 7 | 0.315 | 14.01 | 2693877.52 | Forest | migratory | Insessorial | Carnivore | Invertivore |
| Sp52 | *Serinus serinus* | 9.2 | 13.9 | 29.3 | 11.2 | 7 | 9 | 0.527 | 15.353 | 4819417.99 | Human Modified | migratory | Generalist | Herbivore | Granivore |
| Sp53 | *Sitta europaea* | 20.9 | 20.2 | 23.8 | 20.4 | 8.5 | 9 | 0.316 | 10.763 | 21575986.15 | Forest | sedentary | Insessorial | Carnivore | Invertivore |
| Sp54 | *Streptopelia decaocto* | 20.9 | 20.8 | 35.4 | 149 | 6.75 | 16 | 0.723 | 18.553 | 19265912.02 | Human Modified | sedentary | Terrestrial | Herbivore | Omnivore |
| Sp55 | *Streptopelia turtur* | 22.4 | 22.3 | 43.5 | 132 | 5 | 13 | 0.741 | 16.64 | 17578320.62 | Woodland | migratory | Terrestrial | Herbivore | Granivore |
| Sp56 | *Sturnus vulgaris* | 30.2 | 29 | 38.4 | 77.1 | 11 | 15 | 0.277 | 12.968 | 17082191.68 | Human Modified | migratory | Insessorial | Omnivore | Omnivore |
| Sp57 | *Sylvia atricapilla* | 15.2 | 20.8 | 27 | 16.7 | 7.5 | 7 | 0.342 | 13.28 | 8628077.66 | Woodland | migratory | Insessorial | Omnivore | Omnivore |
| Sp58 | *Curruca communis* | 13.6 | 21.3 | 24.2 | 15.1 | 4.5 | 9 | 0.281 | NA | 14124012.64 | Shrubland | migratory | Insessorial | Omnivore | Invertivore |
| Sp59 | *Troglodytes troglodytes* | 13.8 | 17.6 | 15.7 | 9.7 | 6 | 6 | 0.409 | 12.951 | 15761767.29 | Forest | sedentary | Insessorial | Carnivore | Invertivore |
| Sp60 | *Turdus merula* | 28.5 | 33.6 | 23.1 | 102.7 | 10 | 16 | 0.318 | 13.639 | 10572243.36 | Woodland | migratory | Generalist | Omnivore | Omnivore |
| Sp61 | *Turdus philomelos* | 23.1 | 31.8 | 30.7 | 67.7 | 10 | 14 | 0.353 | 10.886 | 13727296.63 | Forest | migratory | Generalist | Omnivore | Invertivore |
| Sp62 | *Turdus viscivorus* | 26.4 | 32.7 | 35.1 | 117.4 | 8 | 11 | 0.297 | 12.253 | 13574080.75 | Forest | migratory | Insessorial | Omnivore | Omnivore |

B)

|  |  | **Morphological traits** | | | | **Life-history traits** | | **Habitat-related traits** | | **Distribution trait** | **Nominal traits** | | | | |
| --- | --- | --- | --- | --- | --- | --- | --- | --- | --- | --- | --- | --- | --- | --- | --- |
| **SpID** | **Species** | **Beak length (mm)** | **Tarsus Length (mm)** | **Hand Wing Index (HWI)** | **Body Mass (g)** | **Clutch size** | **Lifespan (ys)** | **Species Specialization Index (SSI)** | **Species Temperature Index (STI)** | **Geographical distribution range size (km2)** | **Habitat** | **Migratory status** | **Primary Lifestyle** | **Trophic Level** | **Trophic Niche** |
| Sp1 | *Accipiter nisus* | 19.6 | 53.6 | 35.5 | 220.8 | 5 | 4 | 0.415 | 9.502 | 23601609.31 | Forest | sedentary | Insessorial | Carnivore | Vertivore |
| Sp2 | *Aegithalos caudatus* | 7.6 | 15.9 | 22 | 8.6 | 10 | 8 | 0.251 | 11.228 | 18247301.19 | Forest | sedentary | Insessorial | Carnivore | Invertivore |
| Sp3 | *Alauda arvensis* | 14.6 | 23.6 | 33.6 | 37.3 | 16.2 | 12 | 0.339 | 10.798 | 26018285.25 | Grassland | migratory | Terrestrial | Omnivore | Omnivore |
| Sp4 | *Alcedo atthis* | 42.2 | 9.9 | 26.9 | 31.1 | 6.5 | 7 | 0.651 | 17.41 | 24992154.31 | Riverine | sedentary | Insessorial | Carnivore | Aquatic predator |
| Sp5 | *Alectoris rufa* | 23.4 | 41.3 | 25.8 | 527.9 | 26 | 6 | 0.238 | 15.934 | 953692.19 | Grassland | sedentary | Terrestrial | Herbivore | Herbivore terrestrial |
| Sp6 | *Anas platyrhynchos* | 58.5 | 40.6 | 50.7 | 843.4 | 11 | 29 | 0.315 | 10.5 | 39707247.47 | Wetland | migratory | Aquatic | Herbivore | Herbivore aquatic |
| Sp7 | *Anthus pratensis* | 14.2 | 21.5 | 24.3 | 18.4 | 8 | 8 | 0.585 | NA | 6733599.47 | Grassland | migratory | Terrestrial | Carnivore | Invertivore |
| Sp8 | *Anthus trivialis* | 15.7 | 20.6 | 29.3 | 23.3 | 10 | 8 | 0.337 | 10.322 | 15353264.33 | Woodland | migratory | Terrestrial | Omnivore | Invertivore |
| Sp9 | *Apus apus* | 10.2 | 8.8 | 71.6 | 37.6 | 3 | 21 | 0.737 | 13.837 | 24779919.71 | Human Modified | migratory | Aerial | Carnivore | Invertivore |
| Sp10 | *Ardea cinerea* | 138.9 | 137.9 | 34.6 | 1443 | 4 | 25 | 0.503 | 18.081 | 46421646.29 | Wetland | sedentary | Terrestrial | Carnivore | Aquatic predator |
| Sp11 | *Burhinus oedicnemus* | 43.1 | 75.1 | 47.7 | 459 | 2 | 16 | 0.524 | 19.654 | 9168330.74 | Grassland | migratory | Terrestrial | Carnivore | Invertivore |
| Sp12 | *Buteo buteo* | 35.9 | 75.8 | 38.3 | 759.1 | 3 | 25 | 0.506 | 12.475 | 11719424.27 | Woodland | migratory | Insessorial | Carnivore | Vertivore |
| Sp13 | *Linaria cannabina* | 12.4 | 15.7 | 34.4 | 19.5 | 10 | 9 | NA | 13.802 | 10715477.38 | Shrubland | migratory | Terrestrial | Herbivore | Granivore |
| Sp14 | *Carduelis carduelis* | 15.4 | 14.7 | 33.4 | 16 | 16 | 8 | 0.37 | 13.986 | 11860717.87 | Woodland | migratory | Insessorial | Herbivore | Granivore |
| Sp15 | *Chloris chloris* | 14.4 | 17.3 | 32.5 | 26 | 10 | 13 | 0.477 | 13.587 | 10220595.83 | Woodland | migratory | Generalist | Herbivore | Granivore |
| Sp16 | *Spinus spinus* | 12.8 | 12.7 | 36.5 | 13.2 | 4.5 | 9 | NA | 10.25 | 8968022.11 | Forest | migratory | Insessorial | Herbivore | Granivore |
| Sp17 | *Certhia brachydactyla* | 18.7 | 14.9 | 17.7 | 8.2 | 13 | 9 | 0.291 | 15.184 | 3199552.33 | Forest | sedentary | Insessorial | Carnivore | Invertivore |
| Sp18 | *Cettia cetti* | 14.3 | 20.3 | 14.3 | 13.2 | 9 | 5 | 0.284 | 17.269 | 5290133.33 | Shrubland | sedentary | Generalist | Carnivore | Invertivore |
| Sp19 | *Columba livia f. domestica* | 23.2 | 26.5 | 45.1 | 354.2 | 10 | 6 | 0.63 | 22.352 | 17464191.46 | Human Modified | sedentary | Terrestrial | Herbivore | Granivore |
| Sp20 | *Columba palumbus* | 27.8 | 31.5 | 41.2 | 490 | 2.25 | 16 | 0.339 | 13.717 | 11947217.36 | Woodland | migratory | Terrestrial | Herbivore | Omnivore |
| Sp21 | *Corvus corone* | 55 | 59.4 | 36.9 | 570 | 4.5 | 16 | 0.164 | 10.903 | 33343165.09 | Woodland | sedentary | Terrestrial | Carnivore | Omnivore |
| Sp22 | *Coloeus monedula* | 35.2 | 43.3 | 39.1 | 246 | 5 | 14 | 0.009 | NA | 13975046.48 | Human Modified | sedentary | Terrestrial | Omnivore | Omnivore |
| Sp23 | *Cuculus canorus* | 26 | 21.4 | 43.9 | 111.4 | 13 | 13 | 0.228 | 11.641 | 37338142.79 | Forest | migratory | Insessorial | Carnivore | Invertivore |
| Sp24 | *Cyanistes caeruleus* | 9.7 | 15.2 | 21 | 11.1 | 9 | 2.5 | 0.22 | 13.689 | 8753389.8 | Forest | sedentary | Insessorial | Omnivore | Invertivore |
| Sp25 | *Delichon urbicum* | 10.7 | 11.3 | 54.3 | 14.5 | 8 | 15 | 0.622 | 12.512 | 16377219.72 | Human Modified | migratory | Aerial | Carnivore | Invertivore |
| Sp26 | *Dendrocopos major* | 27.9 | 23.9 | 29.3 | 74.9 | 5.5 | 11 | 0.292 | 11.091 | 24413724.29 | Woodland | sedentary | Insessorial | Omnivore | Omnivore |
| Sp27 | *Dendrocoptes medius* | 16.4 | 19.5 | 28.1 | 59 | 5.5 | 8 | NA | NA | 3966649.98 | Forest | sedentary | Insessorial | Carnivore | Invertivore |
| Sp28 | *Dryobates minor* | 12.6 | 14.3 | 27.4 | 19.8 | 5 | 7 | 0.398 | 10.426 | 18548908.46 | Woodland | sedentary | Insessorial | Carnivore | Invertivore |
| Sp29 | *Emberiza calandra* | 16.2 | 24.4 | 26.5 | 48.5 | 7.5 | 10 | 0.695 | 16.041 | 7483952.2 | Grassland | migratory | Terrestrial | Herbivore | Omnivore |
| Sp30 | *Emberiza cirlus* | 13.4 | 18.2 | 20.2 | 25.6 | 10.5 | 10 | 0.623 | 16.141 | 2173407.94 | Shrubland | migratory | Terrestrial | Omnivore | Granivore |
| Sp31 | *Erithacus rubecula* | 14 | 24.5 | 19.9 | 17.7 | 10 | 15 | 0.151 | 12.317 | 10001378.73 | Forest | migratory | Generalist | Carnivore | Omnivore |
| Sp32 | *Fringilla coelebs* | 14.7 | 17.8 | 27.6 | 23.8 | 4.5 | 14 | 0.194 | 12.546 | 13931193.45 | Forest | migratory | Generalist | Omnivore | Invertivore |
| Sp33 | *Gallinula chloropus* | 33.9 | 45.9 | 32.2 | 339.6 | 14 | 15 | 0.278 | 19.195 | 38515141.7 | Wetland | sedentary | Terrestrial | Omnivore | Omnivore |
| Sp34 | *Garrulus glandarius* | 33 | 39.1 | 19.4 | 159.5 | 6 | 18 | 0.205 | 12.303 | 19458203.9 | Forest | sedentary | Insessorial | Omnivore | Omnivore |
| Sp35 | *Hippolais polyglotta* | 14.5 | 20.4 | 21.2 | 11 | 4 | 6 | 0.347 | 16.239 | 1710837.05 | Shrubland | migratory | Insessorial | Carnivore | Invertivore |
| Sp36 | *Hirundo rustica* | 12.4 | 11.7 | 52.6 | 17.9 | 9 | 16 | 0.773 | 12.867 | 51701054.06 | Human Modified | migratory | Aerial | Carnivore | Invertivore |
| Sp37 | *Luscinia megarhynchos* | 16 | 26.4 | 27.6 | 19.6 | 9 | 5 | 0.298 | 16.392 | 6778462.19 | Shrubland | migratory | Generalist | Carnivore | Invertivore |
| Sp38 | *Motacilla alba* | 16.1 | 23.4 | 31.4 | 23.9 | 11 | 10 | 0.268 | 9.816 | 39488711.64 | Human Modified | migratory | Terrestrial | Carnivore | Invertivore |
| Sp39 | *Motacilla cinerea* | 17.4 | 18.2 | 34.6 | 17.2 | 10 | 3 | 0.397 | 9.879 | 19613139.17 | Riverine | sedentary | Terrestrial | Carnivore | Invertivore |
| Sp40 | *Parus major* | 11.3 | 17.4 | 18.7 | 16.3 | 15.75 | 15 | 0.234 | 14.937 | 32577984.28 | Woodland | sedentary | Insessorial | Omnivore | Invertivore |
| Sp41 | *Passer domesticus* | 13.5 | 17.9 | 27.3 | 26.5 | 10 | 13 | 0.285 | 15.229 | 34407867.59 | Human Modified | sedentary | Terrestrial | Herbivore | Granivore |
| Sp42 | *Phalacrocorax carbo* | 82.7 | 64.2 | 37.1 | 2529 | 5 | 20 | 0.529 | 17.537 | 24540701.98 | Wetland | migratory | Aquatic | Carnivore | Aquatic predator |
| Sp43 | *Phoenicurus ochruros* | 15.4 | 22.4 | 23.1 | 16.5 | 10 | 8 | 0.315 | 12.582 | 13764225.49 | Human Modified | migratory | Insessorial | Omnivore | Invertivore |
| Sp44 | *Phoenicurus phoenicurus* | 13.9 | 21.6 | 25.8 | 14.6 | 12 | 9 | 0.274 | 11.676 | 14485113.51 | Woodland | migratory | Insessorial | Carnivore | Invertivore |
| Sp45 | *Phylloscopus collybita* | 11.6 | 19.7 | 18.4 | 8.3 | 11 | 7 | 0.48 | 12.488 | 7564956.38 | Forest | migratory | Insessorial | Carnivore | Invertivore |
| Sp46 | *Phylloscopus trochilus* | 12.8 | 19.3 | 25.9 | 8.7 | 6 | 7 | 0.209 | NA | 15839222.41 | Forest | migratory | Insessorial | Carnivore | Invertivore |
| Sp47 | *Pica pica* | 40.8 | 49.1 | 22.9 | 217.5 | 6 | 15 | 0.201 | 13.122 | 31831405.08 | Woodland | sedentary | Terrestrial | Omnivore | Omnivore |
| Sp48 | *Picus viridis* | 45 | 29 | 24.7 | 176 | 6 | 7 | 0.448 | NA | 5981746.04 | Woodland | sedentary | Terrestrial | Carnivore | Invertivore |
| Sp49 | *Poecile palustris* | 9.4 | 15.9 | 17.9 | 11.1 | 8 | 10 | 0.39 | 12.602 | 9072135.09 | Forest | sedentary | Insessorial | Omnivore | Invertivore |
| Sp50 | *Prunella modularis* | 14 | 20.4 | 21.2 | 20.2 | 10 | 9 | 0.368 | 11.022 | 6779516.3 | Shrubland | migratory | Terrestrial | Omnivore | Invertivore |
| Sp51 | *Regulus ignicapilla* | 10.9 | 16.5 | 22 | 5.6 | 18 | 7 | 0.315 | 14.01 | 2693877.52 | Forest | migratory | Insessorial | Carnivore | Invertivore |
| Sp52 | *Serinus serinus* | 9.2 | 13.9 | 29.3 | 11.2 | 7 | 9 | 0.527 | 15.353 | 4819417.99 | Human Modified | migratory | Generalist | Herbivore | Granivore |
| Sp53 | *Sitta europaea* | 20.9 | 20.2 | 23.8 | 20.4 | 8.5 | 9 | 0.316 | 10.763 | 21575986.15 | Forest | sedentary | Insessorial | Carnivore | Invertivore |
| Sp54 | *Streptopelia decaocto* | 20.9 | 20.8 | 35.4 | 149 | 6.75 | 16 | 0.723 | 18.553 | 19265912.02 | Human Modified | sedentary | Terrestrial | Herbivore | Omnivore |
| Sp55 | *Streptopelia turtur* | 22.4 | 22.3 | 43.5 | 132 | 5 | 13 | 0.741 | 16.64 | 17578320.62 | Woodland | migratory | Terrestrial | Herbivore | Granivore |
| Sp56 | *Sturnus vulgaris* | 30.2 | 29 | 38.4 | 77.1 | 11 | 15 | 0.277 | 12.968 | 17082191.68 | Human Modified | migratory | Insessorial | Omnivore | Omnivore |
| Sp57 | *Sylvia atricapilla* | 15.2 | 20.8 | 27 | 16.7 | 7.5 | 7 | 0.342 | 13.28 | 8628077.66 | Woodland | migratory | Insessorial | Omnivore | Omnivore |
| Sp58 | *Curruca communis* | 13.6 | 21.3 | 24.2 | 15.1 | 4.5 | 9 | 0.281 | NA | 14124012.64 | Shrubland | migratory | Insessorial | Omnivore | Invertivore |
| Sp59 | *Troglodytes troglodytes* | 13.8 | 17.6 | 15.7 | 9.7 | 6 | 6 | 0.409 | 12.951 | 15761767.29 | Forest | sedentary | Insessorial | Carnivore | Invertivore |
| Sp60 | *Turdus merula* | 28.5 | 33.6 | 23.1 | 102.7 | 10 | 16 | 0.318 | 13.639 | 10572243.36 | Woodland | migratory | Generalist | Omnivore | Omnivore |
| Sp61 | *Turdus philomelos* | 23.1 | 31.8 | 30.7 | 67.7 | 10 | 14 | 0.353 | 10.886 | 13727296.63 | Forest | migratory | Generalist | Omnivore | Invertivore |
| Sp62 | *Turdus viscivorus* | 26.4 | 32.7 | 35.1 | 117.4 | 8 | 11 | 0.297 | 12.253 | 13574080.75 | Forest | migratory | Insessorial | Omnivore | Omnivore |

**Table S3**. Summary tables of Generalized Linear Models (GLMs) for birds’ and bats’ assemblages using as dependent variables A) functional alpha diversity and functional rarity metrics and B) Community Weighted Means (CWMs) of continuous functional traits (birds and bats).

A)

| **Urban assemblage** | **Dependent variable** | **Fixed Effect** | **Estimate** | **Std. Error** | **t-value** | **P-value** | **Significance** | **AICc** |
| --- | --- | --- | --- | --- | --- | --- | --- | --- |
| **Birds** | Functional Richness (FRic) | Intercept | 0.06487 | 0.02776 | 2.337 | 2.38E-02 | * | -63.66638 |
|  | PC1 | 0.01986 | 0.01179 | 1.685 | 9.88E-02 |  |  |
| PC2 | -0.02344 | 0.01133 | -2.069 | 4.42E-02 | * |  |
| TypeUCI | 0.18792 | 0.05029 | 3.737 | 5.13E-04 | *** |  |
| Mean Functional Distance (MFD) | Intercept | 0.369986 | 0.002923 | 126.558 | <2e-16 | *** | -241.5235 |
|  | PC1 | 0.004455 | 0.001448 | 3.076 | 3.46E-03 | ** |  |
| Functional Redundancy (FRed) | Intercept | 0.991412 | 0.000857 | 1156.467 | <2e-16 | *** | -398.8567 |
|  | TypeUCI | -0.003983 | 0.001212 | -3.286 | 0.00191 | ** |  |
| Functional Distinctiveness (FDi) | Intercept | 0.336783 | 0.00212 | 158.877 | <2e-16 | *** | -1596.013 |
|  | PC1 | 0.007902 | 0.00103 | 7.668 | 9.89E-14 | *** |  |
| Functional Scarcity (FSi) | Intercept | 0.571684 | 0.010214 | 55.969 | <2e-16 | *** | -92.7265 |
|  | PC1 | 0.00722 | 0.004965 | 1.454 | 0.147 |  |  |
| **Bats** | Functional Richness (FRic) | Intercept | 0.26743 | 0.04412 | 6.061 | 2.02E-07 | *** | -4.767832 |
|  | TypeUCI | 0.24251 | 0.06239 | 3.887 | 3.11E-04 | *** |  |
| Mean Functional Distance (MFD) | Intercept | 0.38576 | 0.01753 | 22.01 | <2e-16 | *** | -63.66638 |
| Functional Redundancy (FRed) | Intercept | 0.952898 | 0.006126 | 155.554 | <2e-16 | *** | -202.73 |
|  | TypeUCI | -0.023691 | 0.008663 | -2.735 | 0.00872 | ** |  |
| Functional Distinctiveness (FDi) | Intercept | 0.347861 | 0.01372 | 25.355 | <2e-16 | *** | -338.4481 |
|  | PC2 | 0.013677 | 0.005651 | 2.42 | 0.01623 | * |  |
| TypeUCI | 0.057673 | 0.016881 | 3.416 | 0.00074 | *** |  |
| Functional Scarcity (FSi) | Intercept | 0.67705 | 0.03772 | 17.951 | <2e-16 | *** | 182.2506 |
|  | TypeUCI | 0.08463 | 0.04597 | 1.841 | 0.0668 | . |  |

B)

| **Urban assemblage** | **Dependent variable** | **Fixed Effect** | **Estimate** | **Standard error** | **T-value** | **P-value** | **Significance** | **Variable importance** | **AICc** |
| --- | --- | --- | --- | --- | --- | --- | --- | --- | --- |
| Birds | Community Temperature Index | Intercept | 13.57608 | 0.21257 | 63.866 | < 2e-16 | *** |  | 117.9768 |
|  | PC1 | 0.39964 | 0.09155 | 4.365 | 6.92E-05 | *** | 4.3653 |  |
|  | TypeUHI | 0.56489 | 0.36957 | 1.528 | 0.133 |  | 1.5285 |  |
| Community Specialization Index | Intercept | 0.321541 | 0.013808 | 23.286 | < 2e-16 | *** |  | -155.4243 |
|  | PC1 | 0.02183 | 0.005947 | 3.671 | 6.17E-04 | *** | 3.6709 |  |
|  | TypeUHI | 0.04526 | 0.024007 | 1.885 | 6.56E-02 |  | 1.8853 |  |
| Community Body Mass Index | Intercept | 131.891 | 7.689 | 17.15 | < 2e-16 | *** |  | 544.7215 |
| Community Beak Length Index | Intercept | 20.7647 | 0.4052 | 51.24 | < 2e-16 | *** |  | 250.4126 |
| Community Tarsus Length Index | Intercept | 13.4797 | 0.2408 | 55.972 | < 2e-16 | *** |  | 163.4265 |
|  | PC2 | 0.3367 | 0.1387 | 2.428 | 0.019056 | * | 2.4282 |  |
|  | TypeUHI | -1.328 | 0.3499 | -3.796 | 0.000421 | *** | 3.7956 |  |
| Community Hand Wing Index | Intercept | 31.1443 | 0.5215 | 59.726 | < 2e-16 | *** |  | 276.862 |
|  | PC1 | 1.8948 | 0.2583 | 7.334 | 2.26E-09 | *** | 7.3343 |  |
| Community Geographical Range | Intercept | 19385658 | 414396 | 46.781 | < 2e-16 | *** |  | 1635.433 |
|  | PC1 | 1275309 | 205305 | 6.212 | 1.19E-07 | *** | 6.2118 |  |
| Community Egg Number Index | Intercept | 8.433 | 0.146 | 57.77 | < 2e-16 | *** |  | 148.311 |
| Community Lifespan Index | Intercept | 12.81569 | 0.16803 | 76.27 | < 2e-16 | *** |  | 163.6149 |
|  | PC1 | 0.30187 | 0.08325 | 3.626 | 0.000695 | *** | 3.6262 |  |
| Bats | Community Temperature Index | Intercept | 9.8913 | 0.0759 | 130.324 | <2e-16 | *** |  | 84.13879 |
|  | PC2 | 0.13006 | 0.05793 | 2.245 | 2.94E-02 | * | 2.2451 |  |
| Community Specialization Index | Intercept | 1.04601 | 0.01654 | 63.239 | <2e-16 | *** |  | -68.21853 |
|  | PC2 | 0.036 | 0.01263 | 2.851 | 0.0064 | ** | 2.8515 |  |
| Community Body Mass Index | Intercept | 7.3147 | 0.4608 | 15.875 | <2e-16 | *** |  | 229.8331 |
|  | TypeUCI | -1.3884 | 0.6516 | -2.131 | 0.0383 | * | 2.1307 |  |
| Community Forearm Length Index | Intercept | 33.8933 | 0.4675 | 72.492 | <2e-16 | *** |  | 231.2916 |
|  | Type of urban point | -1.3537 | 0.6612 | -2.047 | 0.0461 | * | 2.0474 |  |
| Community Geographical Range Index | Intercept | 8332559 | 124765 | 66.786 | <2e-16 | *** |  | 1480.737 |
|  | TypeUCI | -310117 | 176444 | -1.758 | 0.0852 |  |  |  |
| Community Lifespan Index | Intercept | 14.9005 | 0.3783 | 39.39 | <2e-16 | *** |  | 210.1044 |
|  | TypeUCI | 1.054 | 0.535 | 1.97 | 0.0546 |  | 2.7818 |  |
| Community Call Duration Index | Intercept | 4.61856 | 0.06874 | 67.191 | <2e-16 | *** |  | 39.57259 |
|  | TypeUCI | -0.27042 | 0.09721 | -2.782 | 0.0077 | ** | 2.7818 |  |
| Community Call Peak Frequency Index | Intercept | 43.6219 | 0.5696 | 76.582 | <2e-16 | *** |  | 251.0384 |
|  | TypeUCI | 2.2583 | 0.8056 | 2.803 | 0.00727 | ** | 2.806433 |  |

**Table S4.** Functional distinctiveness (Di) and scarcity (Si) values for (A) bird and (B) bat species recorded in the city of Poitiers. Distinctiveness represents each species’ functional uniqueness, while scarcity reflects its relative rarity within the assemblage.

A)

| **SpID** | **Species** | **Distinctiveness (Di)** | **Scarcity (Si)** |
| --- | --- | --- | --- |
| Sp1 | *Accipiter nisus* | 0.4065 | 0.8102 |
| Sp2 | *Aegithalos caudatus* | 0.2443 | 0.562 |
| Sp3 | *Alauda arvensis* | 0.3084 | 0.3921 |
| Sp4 | *Alcedo atthis* | 0.4083 | 0.64 |
| Sp5 | *Alectoris rufa* | 0.4094 | 0.6565 |
| Sp6 | *Anas platyrhynchos* | 0.4812 | 0.5375 |
| Sp7 | *Anthus pratensis* | 0.3423 | 0.5227 |
| Sp8 | *Anthus trivialis* | 0.2733 | 0.8292 |
| Sp9 | *Apus apus* | 0.4411 | 0.4973 |
| Sp10 | *Ardea cinerea* | 0.6003 | 0.754 |
| Sp11 | *Burhinus oedicnemus* | 0.388 | 0.4485 |
| Sp12 | *Buteo buteo* | 0.4037 | 0.7367 |
| Sp13 | *Linaria cannabina* | 0.3195 | 0.6595 |
| Sp14 | *Carduelis carduelis* | 0.3199 | 0.6222 |
| Sp15 | *Chloris chloris* | 0.3245 | 0.6004 |
| Sp16 | *Spinus spinus* | 0.3394 | 0.0143 |
| Sp17 | *Certhia brachydactyla* | 0.3073 | 0.6769 |
| Sp18 | *Cettia cetti* | 0.3492 | 0.608 |
| Sp19 | *Columba livia f. domestica* | 0.3563 | 0.3407 |
| Sp20 | *Columba palumbus* | 0.3426 | 0.4131 |
| Sp21 | *Corvus corone* | 0.373 | 0.6167 |
| Sp22 | *Coloeus monedula* | 0.3462 | 0.5787 |
| Sp23 | *Cuculus canorus* | 0.3427 | 0.7123 |
| Sp24 | *Cyanistes caeruleus* | 0.3407 | 0.5316 |
| Sp25 | *Delichon urbicum* | 0.369 | 0.5092 |
| Sp26 | *Dendrocopos major* | 0.2823 | 0.7357 |
| Sp27 | *Dendrocoptes medius* | 0.2478 | 0.6047 |
| Sp28 | *Dryobates minor* | 0.3123 | 0.7578 |
| Sp29 | *Emberiza calandra* | 0.3025 | 0.673 |
| Sp30 | *Emberiza cirlus* | 0.362 | 0.7642 |
| Sp31 | *Erithacus rubecula* | 0.3227 | 0.4786 |
| Sp32 | *Fringilla coelebs* | 0.3185 | 0.6491 |
| Sp33 | *Gallinula chloropus* | 0.3962 | 0.5898 |
| Sp34 | *Garrulus glandarius* | 0.3334 | 0.5569 |
| Sp35 | *Hippolais polyglotta* | 0.3995 | 0.7624 |
| Sp36 | *Hirundo rustica* | 0.4147 | 0.8083 |
| Sp37 | *Luscinia megarhynchos* | 0.3356 | 0.7373 |
| Sp38 | *Motacilla alba* | 0.3339 | 0.6954 |
| Sp39 | *Motacilla cinerea* | 0.3917 | 0.754 |
| Sp40 | *Parus major* | 0.3378 | 0.5406 |
| Sp41 | *Passer domesticus* | 0.3529 | 0.2821 |
| Sp42 | *Phalacrocorax carbo* | 0.534 | 0.8091 |
| Sp43 | *Phoenicurus ochruros* | 0.3184 | 0.7231 |
| Sp44 | *Phoenicurus phoenicurus* | 0.32 | 0.7791 |
| Sp45 | *Phylloscopus collybita* | 0.3109 | 0.5512 |
| Sp46 | *Phylloscopus trochilus* | 0.2487 | 0.6166 |
| Sp47 | *Pica pica* | 0.3223 | 0.622 |
| Sp48 | *Picus viridis* | 0.351 | 0.6967 |
| Sp49 | *Poecile palustris* | 0.2503 | 0.7138 |
| Sp50 | *Prunella modularis* | 0.3314 | 0.6395 |
| Sp51 | *Regulus ignicapilla* | 0.3189 | 0.7087 |
| Sp52 | *Serinus serinus* | 0.3246 | 0.6288 |
| Sp53 | *Sitta europaea* | 0.3031 | 0.6735 |
| Sp54 | *Streptopelia decaocto* | 0.3312 | 0.6212 |
| Sp55 | *Streptopelia turtur* | 0.4154 | 0.8143 |
| Sp56 | *Sturnus vulgaris* | 0.315 | 0.5254 |
| Sp57 | *Sylvia atricapilla* | 0.2895 | 0.6274 |
| Sp58 | *Curruca communis* | 0.3388 | 0.8226 |
| Sp59 | *Troglodytes troglodytes* | 0.3268 | 0.4634 |
| Sp60 | *Turdus merula* | 0.3187 | 0.5531 |
| Sp61 | *Turdus philomelos* | 0.2922 | 0.6049 |
| Sp62 | *Turdus viscivorus* | 0.279 | 0.8348 |

**B)**

| **SpID** | **Species** | **Distinctiveness (Di)** | **Scarcity (Si)** |
| --- | --- | --- | --- |
| Sp1 | *Barbastella barbastellus* | 0.4668 | 0.9512 |
| Sp2 | *Eptesicus serotinus* | 0.382 | 0.8908 |
| Sp3 | *Myotis bechsteinii* | 0.4372 | 0.9411 |
| Sp4 | *Myotis daubentonii* | 0.5097 | 0.947 |
| Sp5 | *Myotis emarginatus* | 0.4902 | 0.9766 |
| Sp6 | *Myotis myotis* | 0.6101 | 0.9835 |
| Sp7 | *Myotis mystacinus* | 0.5035 | 0.9542 |
| Sp8 | *Myotis nattereri* | 0.3705 | 0.9897 |
| Sp9 | *Nyctalus leisleri* | 0.243 | 0.8918 |
| Sp10 | *Nyctalus noctula* | 0.4902 | 0.8408 |
| Sp11 | *Pipistrellus kuhlii* | 0.2469 | 0.5356 |
| Sp12 | *Pipistrellus nathusii* | 0.301 | 0.8554 |
| Sp13 | *Pipistrellus pipistrellus* | 0.2854 | 0.1157 |
| Sp14 | *Pipistrellus pygmaeus* | 0.2136 | 0.9848 |
| Sp15 | *Plecotus auritus* | 0.5024 | 0.8473 |
| Sp16 | *Plecotus austriacus* | 0.4392 | 0.9411 |
| Sp17 | *Rhinolophus ferrumequinum* | 0.6527 | 0.9845 |
| Sp18 | *Rhinolophus hipposideros* | 0.5794 | 0.9781 |

**Table S5.** Summary table showingresults of Kruskal–Wallis tests assessing differences in functional diversity metrics (FRic, MFD and FRed) between urban bird and bat assemblages under three scenarios (original, without 10% most distinctive species, without 10% most scarce species). Significant pairwise differences were identified using post hoc Dunn tests with p-values adjusted using the Benjamini–Hochberg correction.

| **Taxa** | **Functional metric** | **Kruskal–Wallis χ² (df)** | **p-value** | **Post hoc comparison (Dunn test)** | **Z** | **Punadj** | **Padj** |
| --- | --- | --- | --- | --- | --- | --- | --- |
| **Birds** | FRic | 8.950 (2) | 0.0114 | FRic – FRic without 10% Di | 2.869 | 0.00412 | 0.01235 |
|  |  |  | FRic – FRic without 10% Si | 0.701 | 0.48337 | 1 |
| MFD | 85.576 (2) | <2.2e-16 | MFD – MFD without 10% Di | 9.107 | 8.47E-20 | 2.54E-19 |
|  |  |  | MFD – MFD without 10% Si | 5.96 | 2.52E-09 | 7.55E-09 |
| FRed | 15.923 (2) | 0.000349 | FRed – FRed without 10% Di | -3.792 | 0.000149 | 0.000448 |
|  |  |  | FRed – FRed without 10% Si | -0.821 | 0.41188 | 1 |
| **Bats** | FRic | 2.070 (2) | 0.3552 | – | – | – | – |
| MFD | 4.673 (2) | 0.09667 | – | – | – | – |
| FRed | 0.9413 (2) | 0.6246 | – | – | – | – |
